# Supplementary material for: Understanding dehydration of Prussian white: from material to aqueous processed composite electrodes for sodium-ion battery application
Source: Royal Society of Chemistry journal article supplement (doi:10.1039/d3ta02570e), 2023-01-01
Supplement: d3ta02570e1.pdf [file d3ta02570e1.pdf]

## SUPPORTING INFORMATION

### Understanding Dehydration of Prussian White: from Material to Aqueous Processed Composite Electrodes for Sodium-Ion Battery Application

F. M. Maddar <sup>a</sup>, D. Walker <sup>b</sup>, T. W. Chamberlain <sup>a</sup>, J. Compton <sup>a</sup>, A. S. Menon <sup>a</sup>, M. Copley <sup>a</sup>,

I. Hasa <sup>\*a</sup>

<sup>a</sup> WMG, The University of Warwick, Coventry, CV4 7AL, United Kingdom

<sup>b</sup> Department of Physics, The University of Warwick, Coventry, CV4 7AL, UK

\* **Corresponding author:** [ivana.hasa@warwick.ac.uk](mailto:ivana.hasa@warwick.ac.uk)

#### Content:

-**Fig. S1** - SEM images of pristine PW powder.

-**Fig. S2 and Table S1** - Fitted XRD patterns and refined structural parameters for dehydrated PW powders exposed to air/moisture for 2, 5 and 7 hours.

-**Fig. S3 and Table S2** - Fitted XRD patterns and refined structural parameters for PW electrodes dried at 170 °C for 15, 24, and 48 hours under dynamic vacuum of 10<sup>-2</sup> and 10<sup>-3</sup> mbar.

-**Fig. S4** - Selected zoomed high voltage region of Fig. 7 highlighting features attributable to the presence of residual water and its progressive decrease upon drying.

-**Fig. S5** - Voltage profiles of Na half cells containing PW electrodes dried at 150°C and 170 °C under a dynamic vacuum of 10<sup>-3</sup> mbar.

-**Fig. S6 and Table S3** Example plot of a single step for a GITT test and list of parameters used to calculate diffusion coefficients.

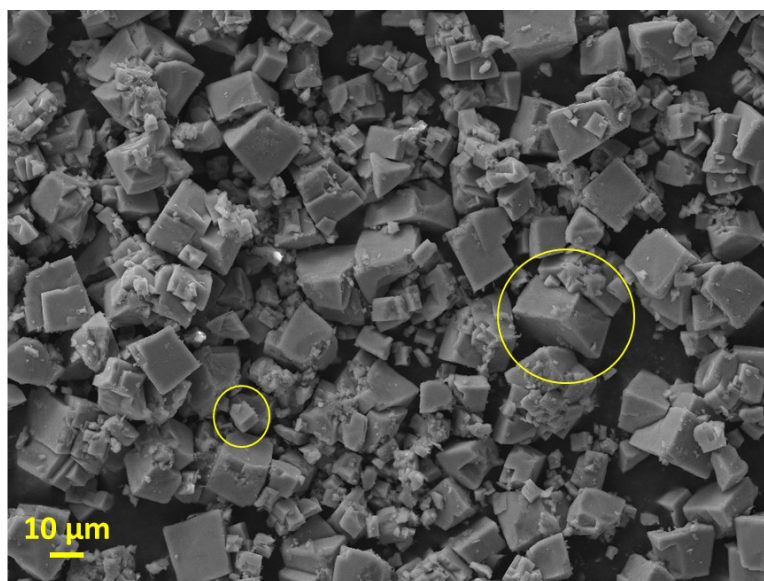

**Figure S1.** SEM image of pristine PW material in its pristine monoclinic phase.

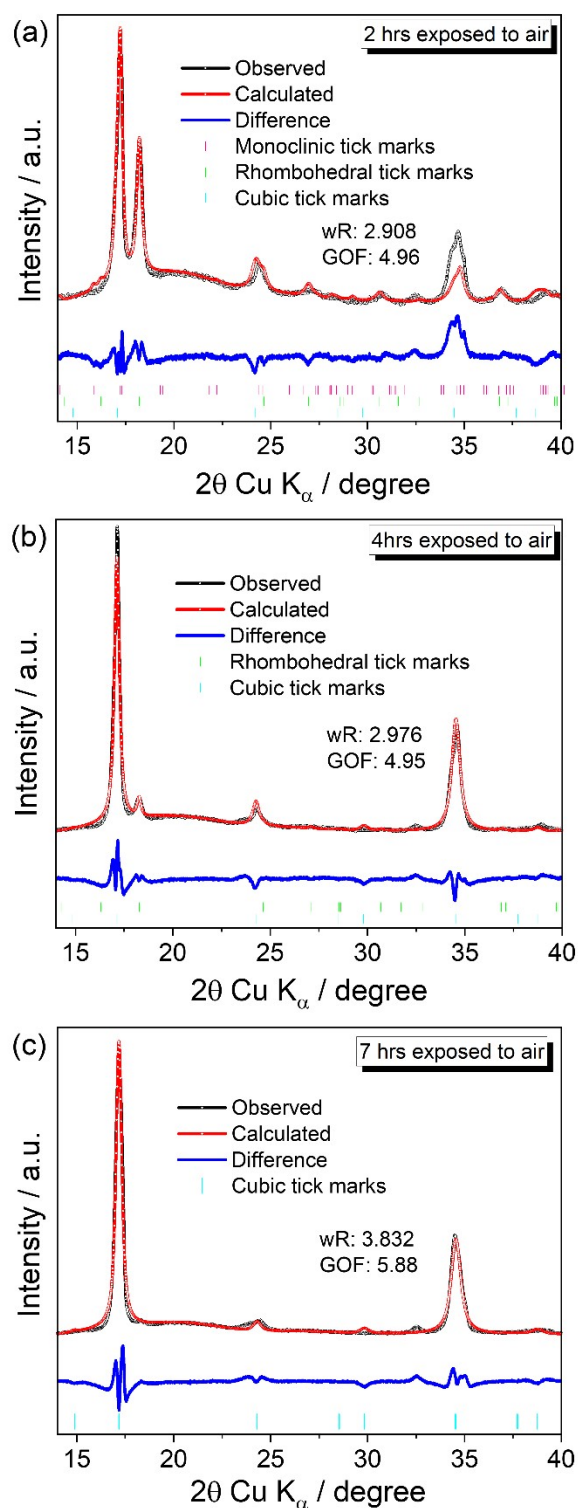

**Figure S2.** Fitted XRD patterns of dehydrated PW powders (15 hours) exposed to air/moisture for 2, 5 and 7 hours.

**Table S1.** Refined structural parameters for fitted data reported in Fig. S1 (dehydrated PW powders exposed in air/moisture for 2, 4, and 7 hours).

| Exposed samples           | Monoclinic (P2 <sub>1</sub> /n) |           |           |             |                       | Cubic (Fm-3m) |                       | Rhombohedral (R-3) |            |                       |
|---------------------------|---------------------------------|-----------|-----------|-------------|-----------------------|---------------|-----------------------|--------------------|------------|-----------------------|
|                           | a (Å)                           | b (Å)     | c (Å)     | $\beta$ (°) | vol (Å <sup>3</sup> ) | a (Å)         | vol (Å <sup>3</sup> ) | a (Å)              | c (Å)      | vol (Å <sup>3</sup> ) |
| Pristine powder           | 10.4543(9)                      | 7.4441(9) | 7.2865(8) | 92.712(14)  | 566.431(28)           |               |                       |                    |            |                       |
| Powder dried 15 hrs       | 10.3277(8)                      | 7.0459(6) | 7.5946(7) | 91.725(17)  | 552.391(23)           |               |                       | 6.5476(4)          | 19.007(4)  | 705.67(3)             |
| Powder 15 hr exposed 2 hr | 10.3219(19)                     | 6.709(10) | 8.046(17) | 90.71(10)   | 557.2(7)              | 10.4155(18)   | 1129.9(6)             | 6.624(5)           | 18.644(23) | 708.47(31)            |
| Powder 15 hr exposed 4 hr |                                 |           |           |             |                       | 10.4207(15)   | 1131.6(4)             | 6.609(13)          | 18.77(6)   | 710.1(8)              |
| Powder 15 hr exposed 7 hr |                                 |           |           |             |                       | 10.4329(4)    | 1135.59(12)           |                    |            |                       |

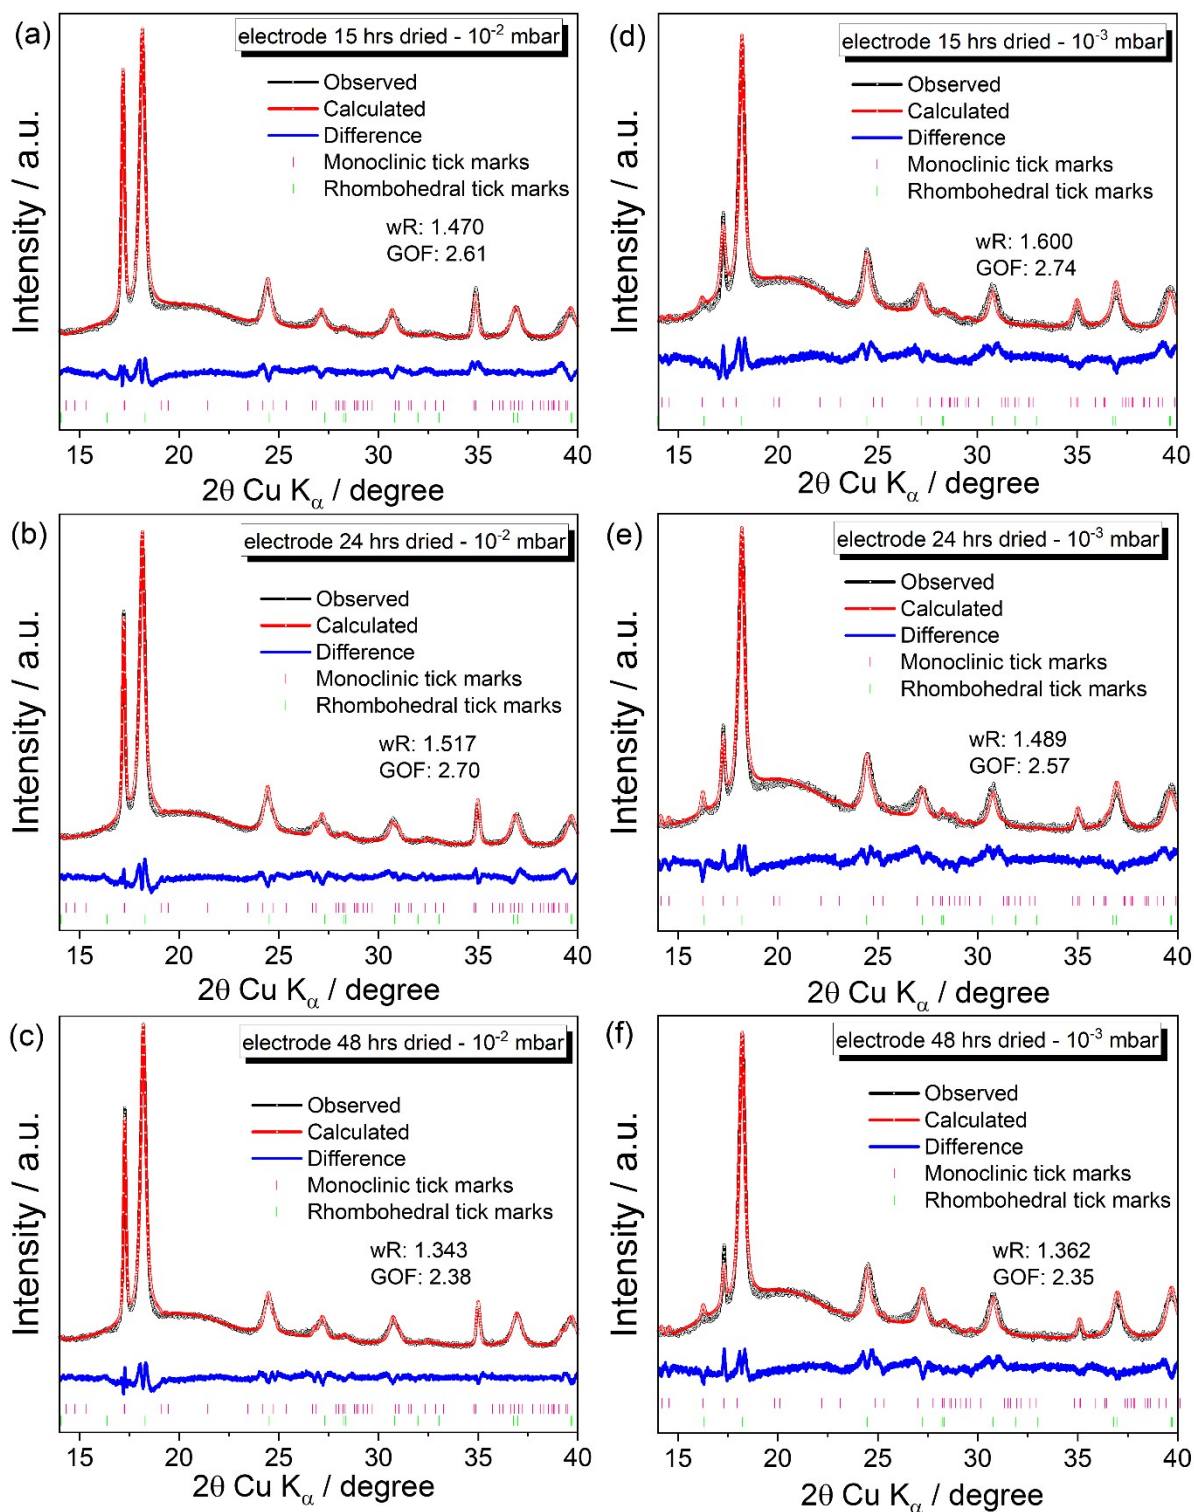

**Figure S3.** Fitted XRD patterns of dehydrated PW electrodes dried at 170 °C for 15, 24, and 48 hours under dynamic vacuum conditions at  $10^{-2}$  mbar (a-c) and at  $10^{-3}$  mbar (d-f).

**Table S2.** Refined structural parameters for fitted data reported in Fig. S2.

| <b>10<sup>-2</sup> mbar</b> | <b>Monoclinic (P2<sub>1</sub>/n)</b> |            |            |            |                       | <b>Rhombohedral (R-3)</b> |           |                       |
|-----------------------------|--------------------------------------|------------|------------|------------|-----------------------|---------------------------|-----------|-----------------------|
|                             | a (Å)                                | b (Å)      | c (Å)      | β (°)      | vol (Å <sup>3</sup> ) | a (Å)                     | c (Å)     | vol (Å <sup>3</sup> ) |
| Electrode 15 hrs            | 10.2770(24)                          | 7.040(5)   | 7.506(5)   | 91.54(3)   | 542.88(33)            | 6.5563(9)                 | 18.882(7) | 702.92(5)             |
| Electrode 24 hrs            | 10.2310(21)                          | 6.952(3)   | 7.554(3)   | 91.70(5)   | 537.16(28)            | 6.5378(9)                 | 18.877(3) | 698.80(7)             |
| Electrode 48 hrs            | 10.2552(16)                          | 6.9507(18) | 7.5751(18) | 91.817(31) | 539.71(5)             | 6.5520(9)                 | 18.898(3) | 702.61(6)             |
| <b>10<sup>-3</sup> mbar</b> | <b>Monoclinic (P2<sub>1</sub>/n)</b> |            |            |            |                       | <b>Rhombohedral (R-3)</b> |           |                       |
| Electrode 15 hrs            | 10.238(4)                            | 6.437(8)   | 7.666(12)  | 91.53(8)   | 505.0(9)              | 6.5341(27)                | 18.912(5) | 699.3(4)              |
| Electrode 24 hrs            | 10.2426(26)                          | 6.417(3)   | 7.694(6)   | 91.65(4)   | 505.5(4)              | 6.5374(25)                | 18.944(5) | 701.2(4)              |
| Electrode 48 hrs            | 10.2181(27)                          | 6.411(4)   | 7.678(6)   | 91.50(5)   | 502.8(5)              | 6.5342(24)                | 18.912(4) | 699.3(4)              |

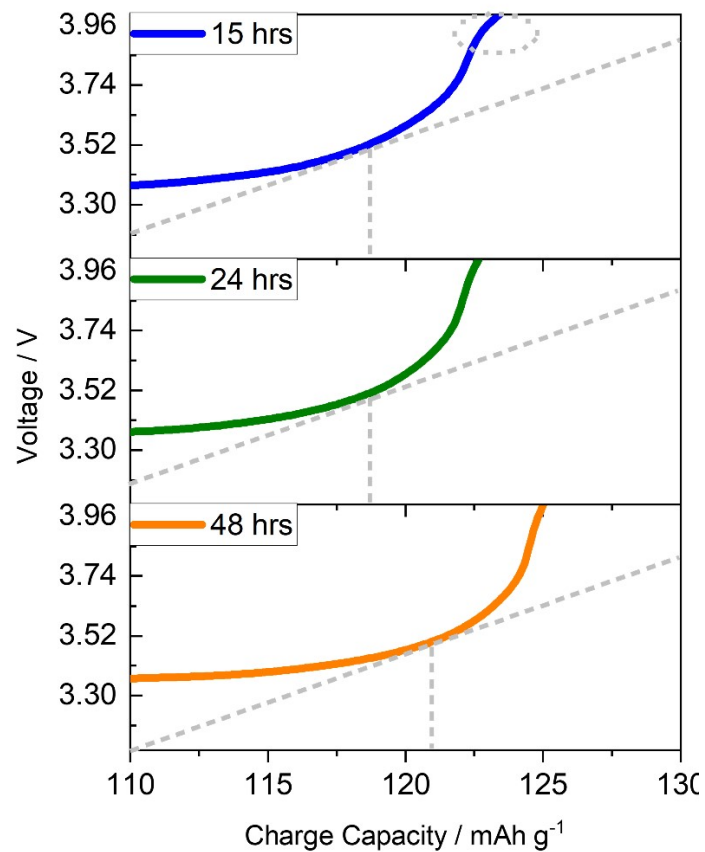

**Fig. S4** Selected zoomed high voltage region of Fig. 7 for electrodes dried at 170 °C for 15, 24 and 48 hours under dynamic vacuum at  $10^{-2}$  mbar, showing features attributable to the presence of residual water (above 3.8 V) and its progressive decrease upon drying.

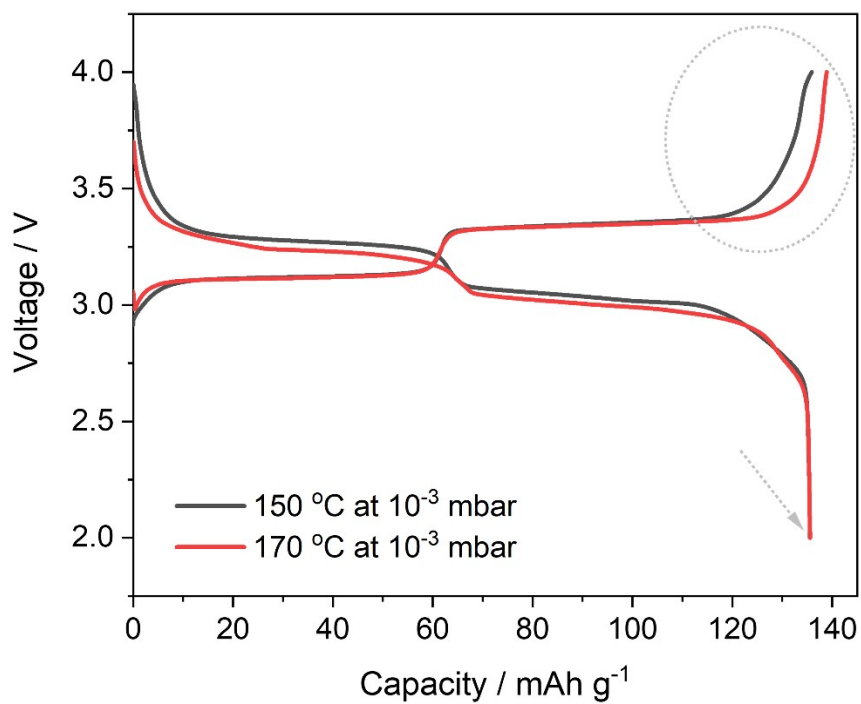

**Figure S5.** First charge/discharge voltage profiles of Na half cells containing PW electrodes dried at 150°C and 170 °C under a dynamic vacuum of 10<sup>-3</sup> mbar. Test conducted at 25 °C using 1M NaPF<sub>6</sub> in diglyme electrolyte within the 2.0 - 4.0 V range. (C/10, 1C=140 mA g<sup>-1</sup>).



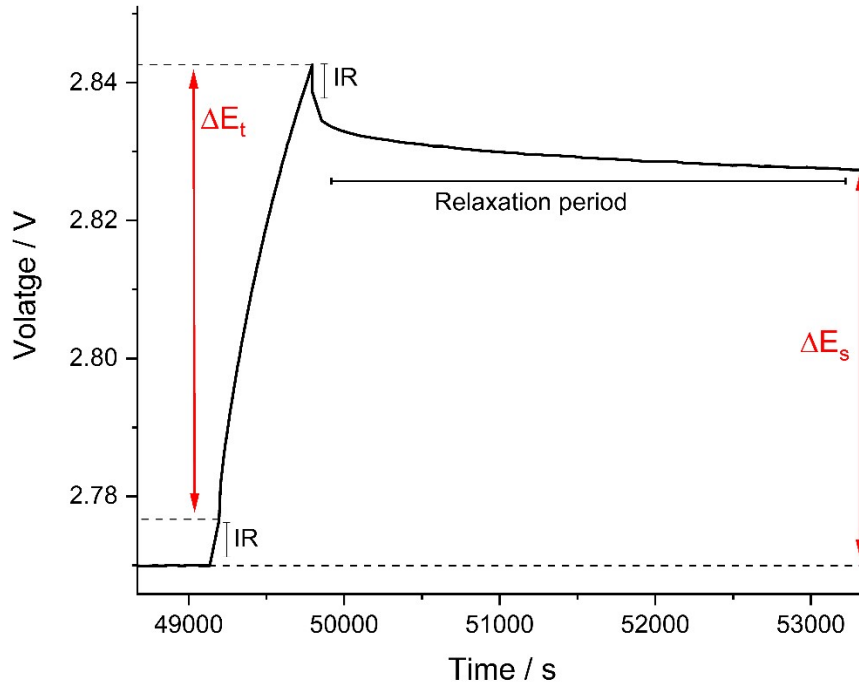

**Figure S6.** Example plot of a single step for a GITT test.

The  $\text{Na}^+$  diffusion coefficient was calculated by using the following simplified Eq. (1)<sup>1,2</sup>:

$$D = \frac{4}{\pi\tau} \cdot \left(\frac{m V_m}{MS}\right)^2 \cdot \left(\frac{\Delta E_s}{\Delta E_t}\right)^2 \quad (1)$$

Where  $m$ ,  $V_m$ , and  $M$  represent the active mass, the molar volume, and the molar mass of the PW material, respectively.  $\tau$  denotes the duration of a current pulse, and  $S$  is the electrode surface area.  $\Delta E_t$  represents the total change of cell voltage during a constant current pulse of a single-step GITT (neglecting the IR-drop), and  $\Delta E_s$  is the voltage variation during a current pulse in two adjacent GITT process, as illustrated in Figure S5.

**Table S3.** Parameters used to calculate diffusion coefficient of a representative PW electrode.

|                                                                                                      |                             |
|------------------------------------------------------------------------------------------------------|-----------------------------|
| Electrode active mass                                                                                | 23.898 mg                   |
| Electrode area                                                                                       | 1.72 cm <sup>2</sup>        |
| Electrode thickness                                                                                  | 85 μm                       |
| PW molecular weight<br>(Na <sub>1.80(5)</sub> Fe [Fe (CN) <sub>6</sub> ] · 1.84(3) H <sub>2</sub> O) | 343.429 g mol <sup>-1</sup> |

Molar volume was obtained by initially calculating the number of moles through Eq. (2). Following on, Eq. (3) was used to calculate the volume of the electrode. The resulting values were then incorporated into Eq. (4) to obtain the molar volume.

$$\text{Moles} = \frac{\text{Active mass}}{\text{Molecular weight}} \quad (2)$$

$$\text{Volume} = \text{Electrode area} \cdot \text{Electrode thickness} \quad (3)$$

$$\text{Molar volume} = \frac{\text{Volume}}{\text{Moles}} \quad (4)$$

## References

- 1 W. Wang, Y. Gang, Z. Hu, Z. Yan, W. Li, Y. Li, Q.-F. Gu, Z. Wang, S.-L. Chou and H.-K. Liu, *Nat. Commun.*, 2020, **11**, 980.
- 2 W. Ren, Z. Zhu, M. Qin, S. Chen, X. Yao, Q. Li, X. Xu, Q. Wei, L. Mai and C. Zhao, *Adv. Funct. Mater.*, 2019, **29**, 1806405.
